# Supplementary material for: Highly efficient non-doped blue organic light emitting diodes based on a D–π–A chromophore with different donor moieties
Source: Royal Society of Chemistry journal article supplement (doi:10.1039/c6ra28303a), 2017-01-01
Supplement: c6ra28303a1.pdf [file c6ra28303a1.pdf]

## Supporting information

### Highly Efficient Non-Doped Blue Organic Light Emitting Diodes Based On D- $\pi$ -A Chromophore with Different Donor Moieties

Venugopal Thanikachalam\*, Palanivel Jeeva, Jayaraman Jayabharathi

*Department of Chemistry, Annamalai University, Annamalainagar 608 002, Tamilnadu, India*

\* Address for correspondence

Dr. V. Thanikachalam  
Professor of Chemistry  
Department of Chemistry  
Annamalai University  
Annamalainagar 608 002  
Tamilnadu, India.  
Tel: +91 9488476098  
E-mail: vtchalam2005@yahoo.com

## **Contents**

**SI-I: Solvatochromic Experiments**

**SI-II: Charge-Transfer Intexes**

**SI-III: Figures**

**SI-IV: Schemes**

**SI-V: Tables**

### SI-I: Solvatochromic Experiments

According to Lippert–Mataga equation the dipole moment can be estimated from the slope of the plot of Stokes shift ( $\tilde{\nu}_{abs} - \tilde{\nu}_{flu}$ ) against solvent polarity function  $f(\epsilon, n)$ ,

$hc(\tilde{\nu}_{abs} - \tilde{\nu}_{flu}) = hc(hc\tilde{\nu}_{abs}^{vac} - hc\tilde{\nu}_{flu}^{vac}) + 2(\mu_e - \mu_g)^2 / a_o^3 [(\epsilon - 1/2\epsilon + 1) - 1/2(n^2 - 1/2n^2 + 1)]$ , where  $\mu_g$  and  $\mu_e$  are ground and excited state dipole moments respectively,  $\tilde{\nu}_{abs}$  and  $\tilde{\nu}_{abs}^{vac}$  are the spectral positions of a solvent-equilibrated absorption maxima and extrapolated to gas-phase,  $\tilde{\nu}_{flu}$  and  $\tilde{\nu}_{flu}^{vac}$  are the spectral positions of the solvent equilibrated fluorescence maxima and extrapolated to the gas-phase, respectively,  $a_o$  is Onsager radius and  $\epsilon$  and  $n$  are the dielectric constant and refractive index of the solvent, respectively.

The fitted results shown that the non-linear correlation between Stokes shift and solvent polarity function. Estimation of free energy change of salvation ( $\Delta G_{solv}$ ) and reorganization energies ( $\lambda$ ) in various solvents are displayed in Tables S6 and S7. Marcus shown that  $E(A) = \Delta G_{solv} + \lambda_1$  and  $E(F) = \Delta G_{solv} - \lambda_0$ ;  $E(A) + E(F) = 2\Delta G_{solv}$ ;  $E(A) - E(F) = 2\lambda$  (under,  $\lambda_0 \approx \lambda_1 \approx \lambda$ ), where  $E(A)$  and  $E(F)$  are absorption maxima and fluorescence maxima in  $cm^{-1}$ , respectively,  $\Delta G_{solv}$  is difference in free energy of ground and excited states in a given solvent and  $\lambda$  is reorganization energy. The difference between  $\Delta G_{hex}$  and  $\Delta G_{sol}$  gives the free energy change required for hydrogen bond formation. The plot of  $\Delta(\Delta G_{solv})$  against  $f(\epsilon, n)$  has been shown in Figure S6. The definite reorganization energies confirmed the interaction between low frequency motions such as reorientation of solvent cell with low and medium frequency nuclear motion of the solute.

### SI-II: Charge–Transfer Intexes

The hole–particle pair interactions have been related to the distance covered during the excitations one possible descriptor  $\Delta r$  intex could be used to calculate the average distance which is weighted in function of the excitation coefficients.

$$\Delta r = \frac{\sum_{ia} k_{ia}^2 |\langle \varphi_a | r | \varphi_a \rangle - \langle \varphi_i | r | \varphi_i \rangle|}{\sum_{ia} K_{ia}^2} \dots\dots\dots (S1)$$

where  $|\langle \varphi_i | r | \varphi_i \rangle|$  is the norm of the orbital centroid [1–4].  $\Delta r$ -index will be expressed in Å.

The density variation associated to the electronic transition is given by

$$\Delta \rho(r) = \rho_{EX}(r) - \rho_{GS}(r) \dots\dots\dots (S2)$$

where  $\rho_{GS}(r)$  and  $\rho_{EX}(r)$  are the electronic densities of to the ground and excited states, respectively. Two functions,  $\rho_+(r)$  and  $\rho_-(r)$ , corresponds to the points in space where an increment or a depletion of the density upon absorption is produced and they can be defined as follows:

$$\rho_+(r) = \begin{cases} \Delta \rho(r) & \text{if } \Delta \rho(r) > 0 \\ 0 & \text{if } \Delta \rho(r) < 0 \end{cases} \dots\dots\dots (S3)$$

$$\rho_-(r) = \begin{cases} \Delta \rho(r) & \text{if } \Delta \rho(r) < 0 \\ 0 & \text{if } \Delta \rho(r) > 0 \end{cases} \dots\dots\dots (S4)$$

The barycenters of the spatial regions  $R_+$  and  $R_-$  are related with  $\rho_+(r)$  and  $\rho_-(r)$  and are shown as

$$R_+ = \frac{\int r \rho_+(r) dr}{\int \rho_+(r) dr} = (x_+, y_+, z_+) \dots\dots\dots (S5)$$

$$R_- = \frac{\int r \rho_-(r) dr}{\int \rho_-(r) dr} = (x_-, y_-, z_-) \dots\dots\dots (S6)$$

The spatial distance ( $D_{CT}$ ) between the two barycenters  $R_+$  and  $R_-$  of density distributions can thus be used to measure the CT excitation length

$$D_{CT} = |R_+ - R_-| \dots\dots\dots (S7)$$

The transferred charge ( $q_{CT}$ ) can be obtained by integrating over all space  $\rho_+$  ( $\rho_-$ ). Variation in dipole moment between the ground and the excited states ( $\mu_{CT}$ ) can be computed by the following relation:

$$\|\mu_{CT}\| = D_{CT} \int \rho_+(r) dr = D_{CT} \int \rho_-(r) dr \quad \dots\dots\dots (S8)$$

$$= D_{CT} q_{CT} \dots\dots\dots (S9)$$

The difference between the dipole moments  $\|\mu_{CT}\|$  have been computed for the ground and the excited states  $\Delta\mu_{ES-GS}$ . The two centroids of charges ( $C^+/C^-$ ) associated to the positive and negative density regions are calculated as follows. First the root-mean-square deviations along the three axis ( $\sigma_{aj}$ ,  $j = x, y, z$ ;  $a = +$  or  $-$ ) are computed as

$$\sigma_{a,j} = \sqrt{\frac{\sum_i \rho_a(r_i) (j_i - j_a)^2}{\sum_i \rho_a(r_i)}} \quad \dots\dots\dots (S10)$$

The two centroids ( $C_+$  and  $C_-$ ) are defined as

$$C_+(r) = A_+ e \left( -\frac{(x - x_+)^2}{2\sigma_{+x}^2} - \frac{(y - y_+)^2}{2\sigma_{+y}^2} - \frac{(z - z_+)^2}{2\sigma_{+z}^2} \right) \dots\dots\dots (S11)$$

$$C_-(r) = A_- e \left( -\frac{(x - x_-)^2}{2\sigma_{-x}^2} - \frac{(y - y_-)^2}{2\sigma_{-y}^2} - \frac{(z - z_-)^2}{2\sigma_{-z}^2} \right) \dots\dots\dots (S12)$$

The normalization factors ( $A_+$  and  $A_-$ ) are used to impose the integrated charge on the centroid to be equal to the corresponding density change integrated in the whole space:

$$A_+ = \frac{\int \rho_+(r) dr}{\int e \left( -\frac{(x - x_+)^2}{2\sigma_{+x}^2} - \frac{(y - y_+)^2}{2\sigma_{+y}^2} - \frac{(z - z_+)^2}{2\sigma_{+z}^2} \right) dr} \quad \dots\dots\dots (S13)$$

$$A_{-} = \frac{\int \rho_{-}(r) dr}{\int e\left(-\frac{(x-x_{-})^2}{2\sigma_{-x}^2} - \frac{(y-y_{-})^2}{2\sigma_{-y}^2} - \frac{(z-z_{-})^2}{2\sigma_{-z}^2}\right) dr} \dots\dots\dots (S14)$$

H index is defined as half of the sum of the centroids axis along the D–A direction, if the D–A direction is along the X axis, H is defined by the relation:

$$H = \frac{\sigma_{+x} + \sigma_{-x}}{2} \dots\dots\dots (S15)$$

The centroid along X axis is expected. The t index represents the difference between  $D_{CT}$  and H:

$$t = D_{CT} - H \dots\dots\dots (S16)$$

## SI-III: Figures

**Figure S1:** Computed hole and particle distribution of MPPIS-Cz and MPPIS-TPA for  $S_1$ – $S_5$ ; green and blue areas represents increased and decreased electron density, respectively.

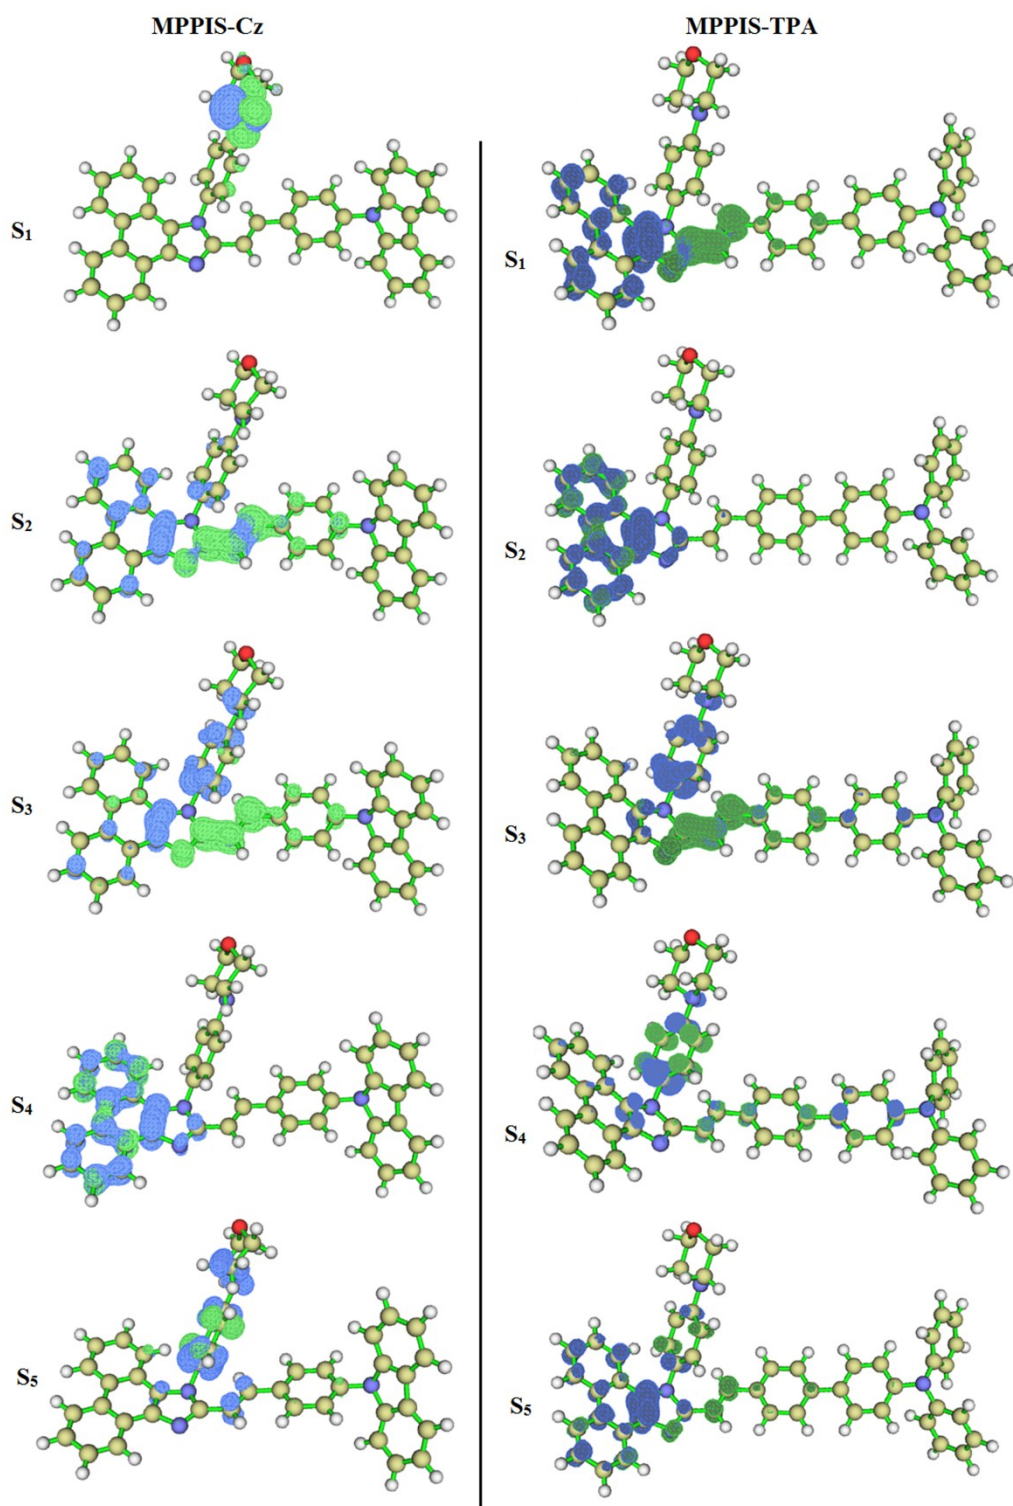

**Figure S2:** Contour plots of transition density matrices (TDM) of MPPIS-Cz for  $S_1$ – $S_5$  states.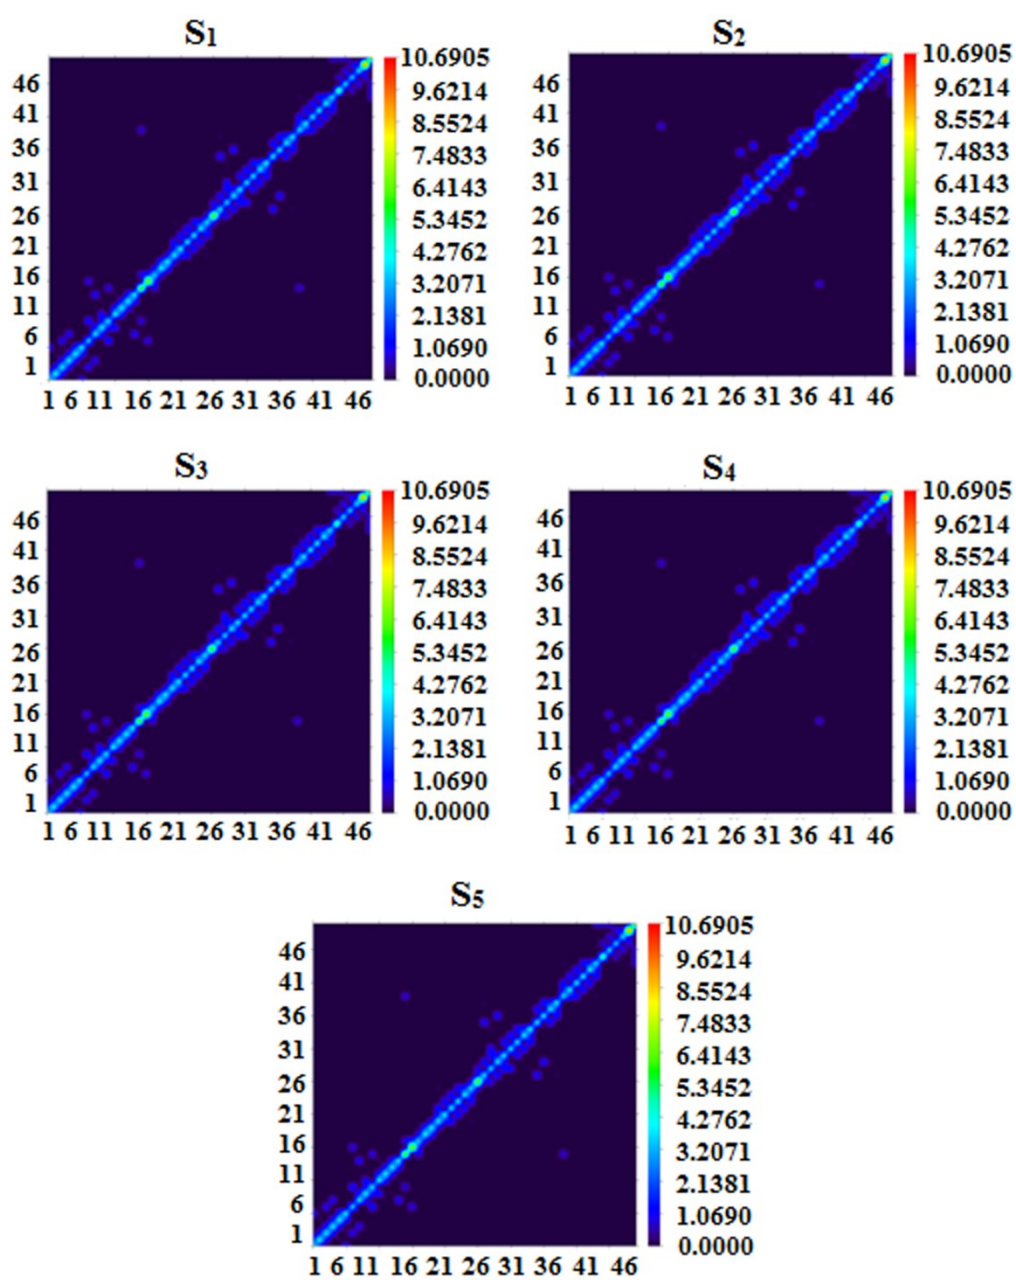



**Figure S3:** Contour plots of transition density matrices (TDM) of MPPIS-TPA for  $S_1$ - $S_5$  states.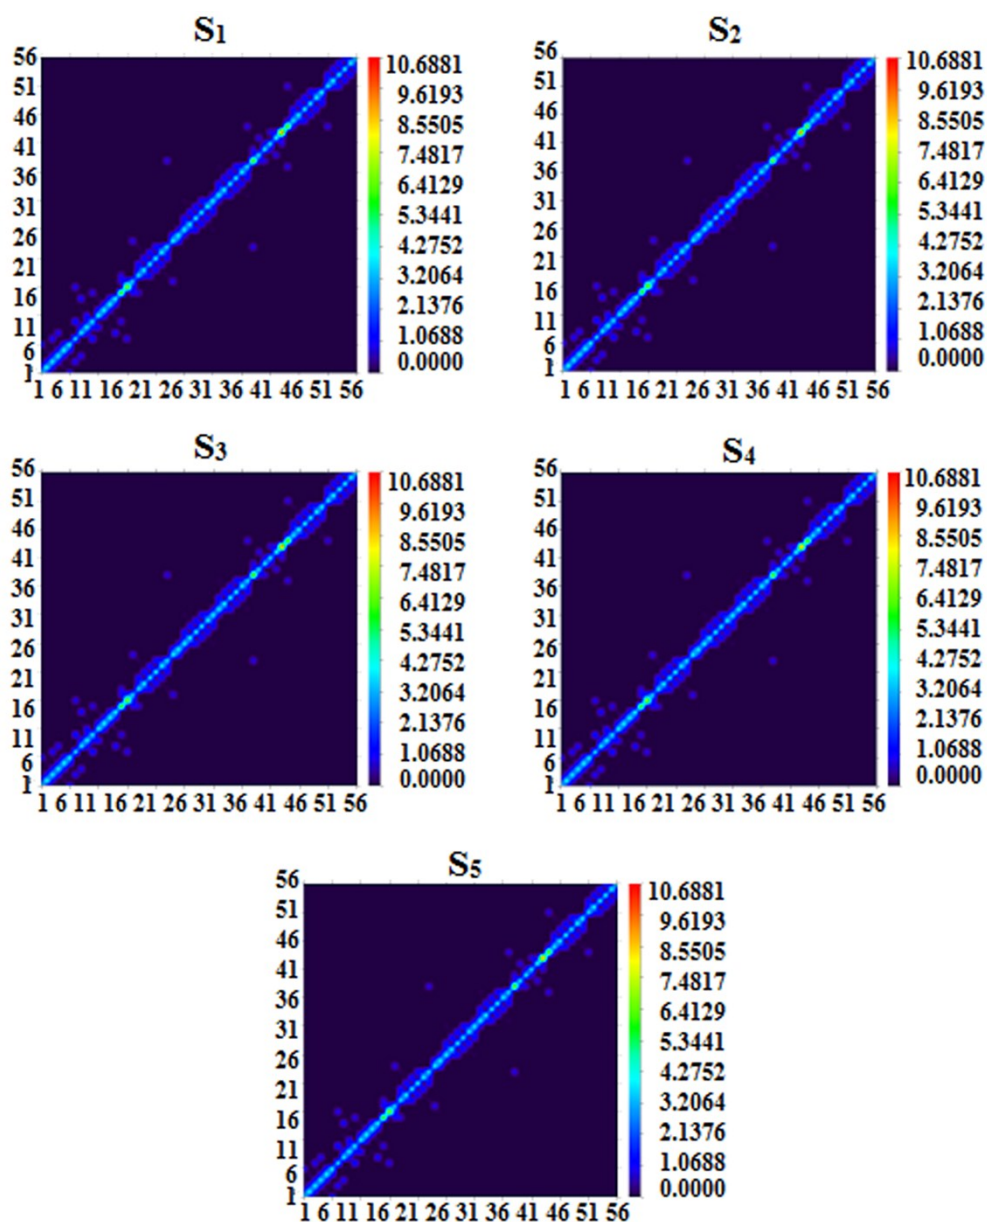

**Figure S4:** Normalized absorption (a and b) and emission spectra (c and d) of MPPIS-Cz and MPPIS-TPA.

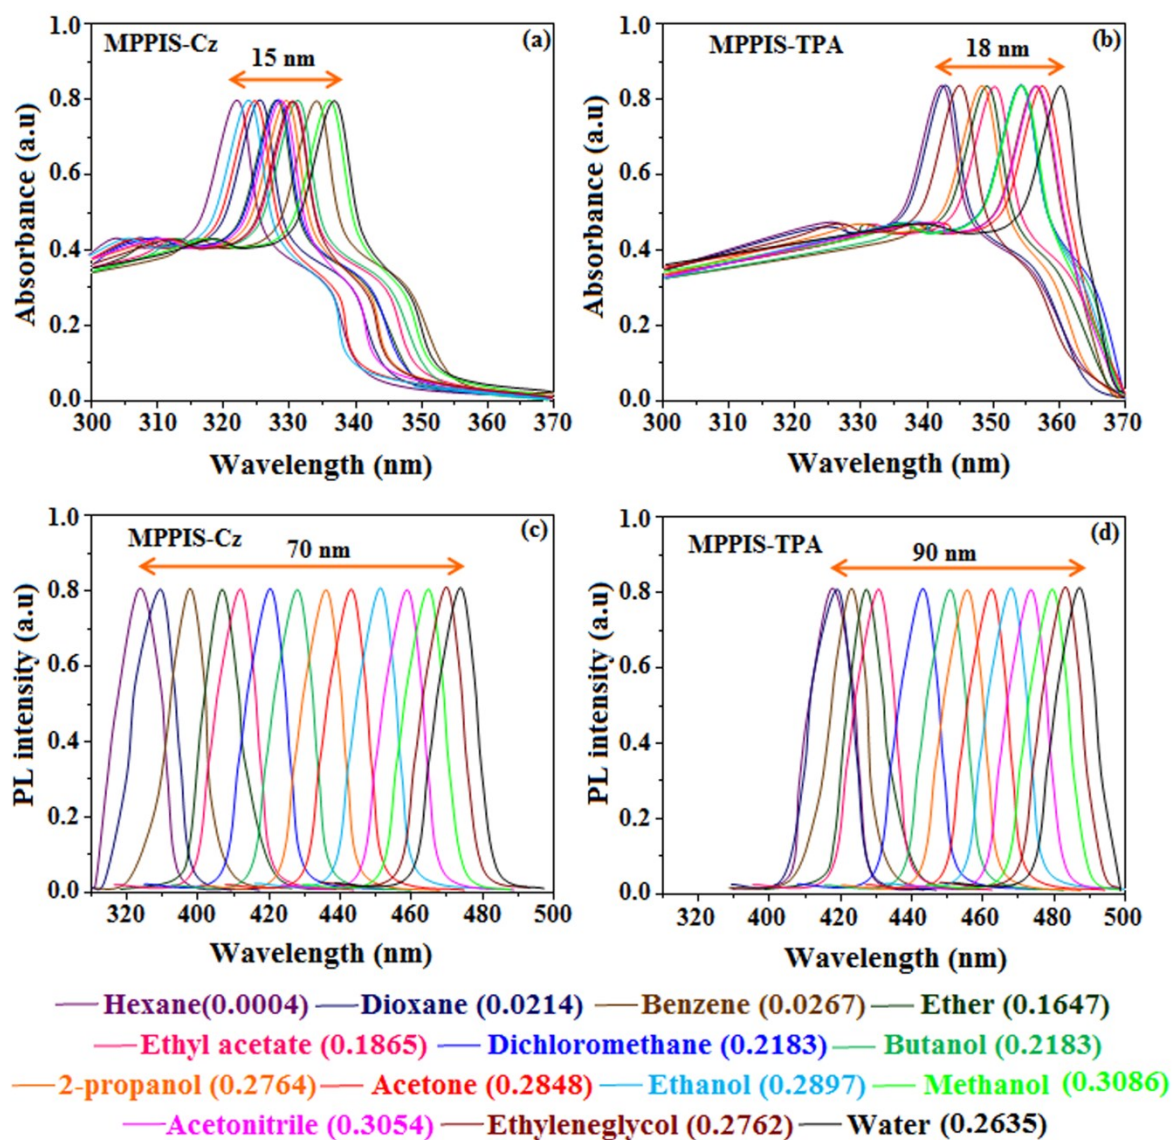

**Figure S5:** Radiative transition rates ( $k_r$ ) and non-radiative transition rates ( $k_{nr}$ ) of MPPIS-TPA and MPPIS-Cz.

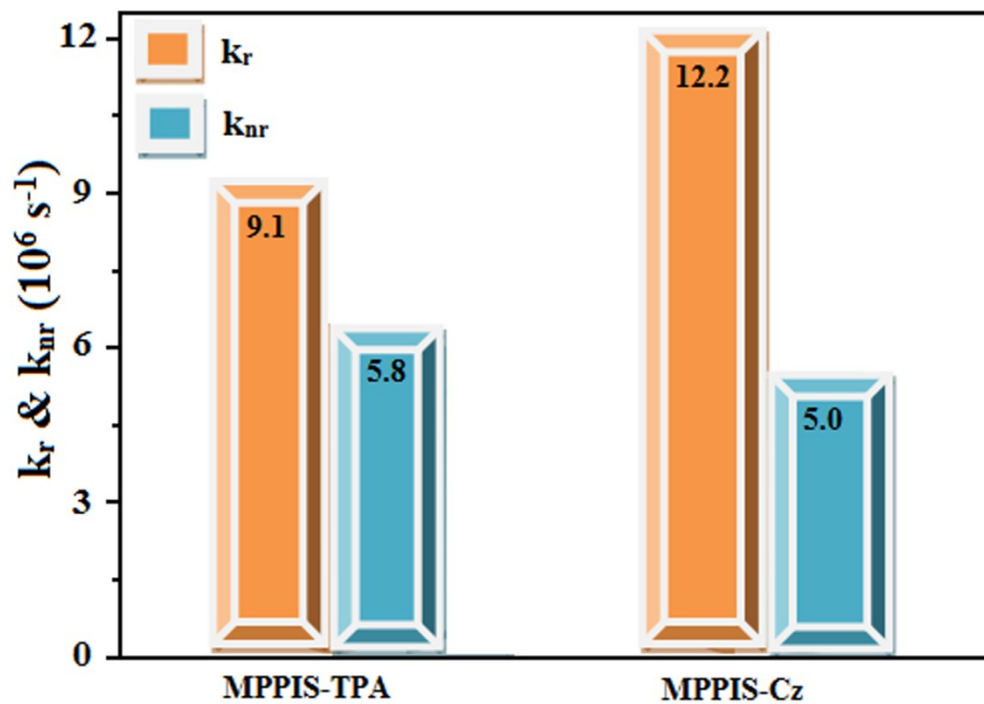

**Figure S6:** (a) Plot of  $\Delta$  ( $\Delta G_{\text{hex}} - \Delta G_{\text{sol}}$ ) versus solvent polarity function,  $f(\epsilon, n)$  of MPPIS-Cz and MPPIS-TPA; (b) Plot of  $\lambda_0$  depend on the solvent polarity function,  $f(\epsilon, n)$  of MPPIS-Cz and MPPIS-TPA.

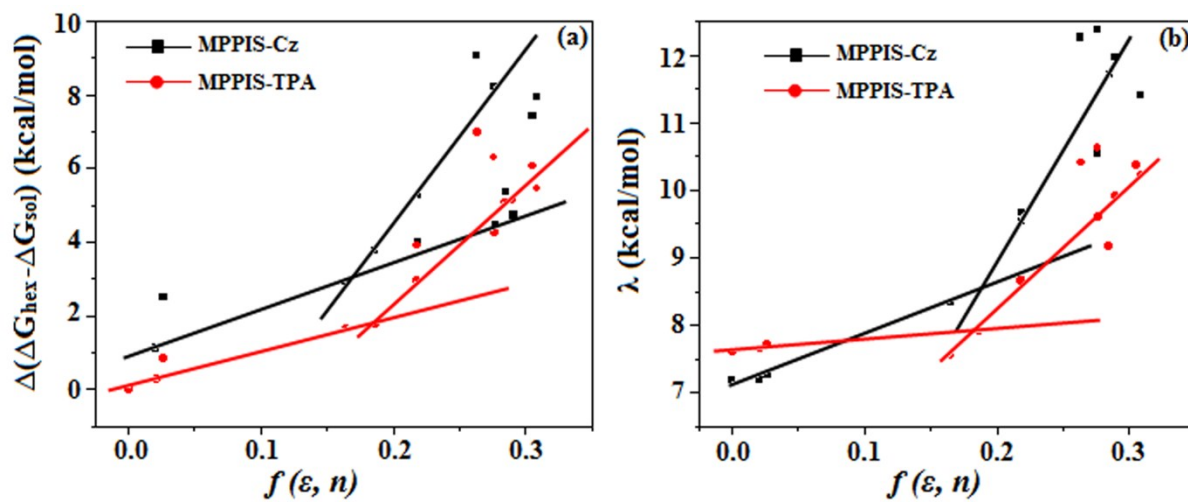

## SI-IV: Schemes

Scheme S1. Synthetic route of MPPIS-Cz and MPPIS-TPA

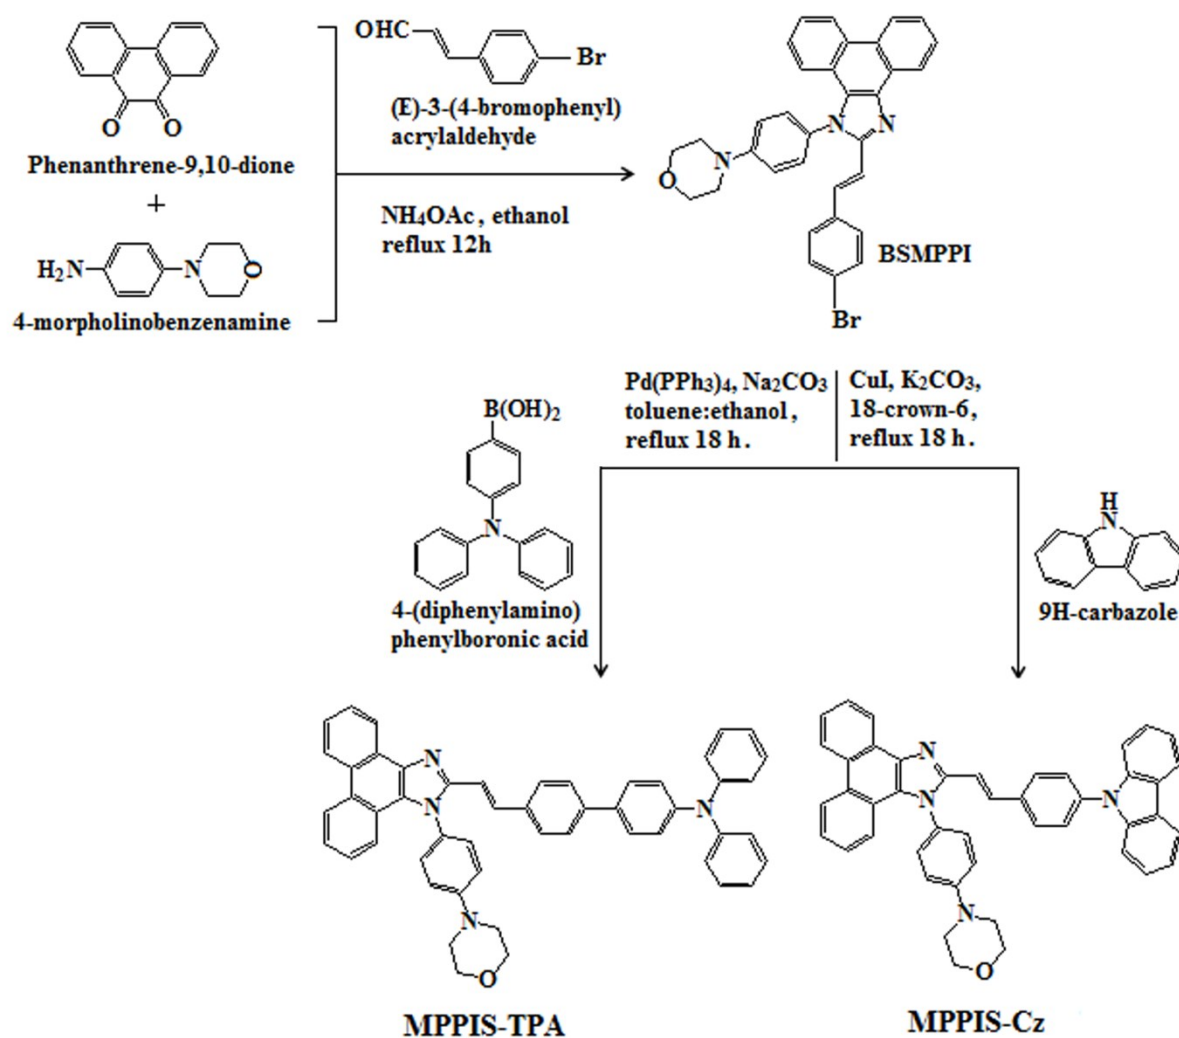

**Scheme S2.** Schematic diagram of hybridization processes of LE and CT states of MPPIS-Cz and MPPIS-TPA

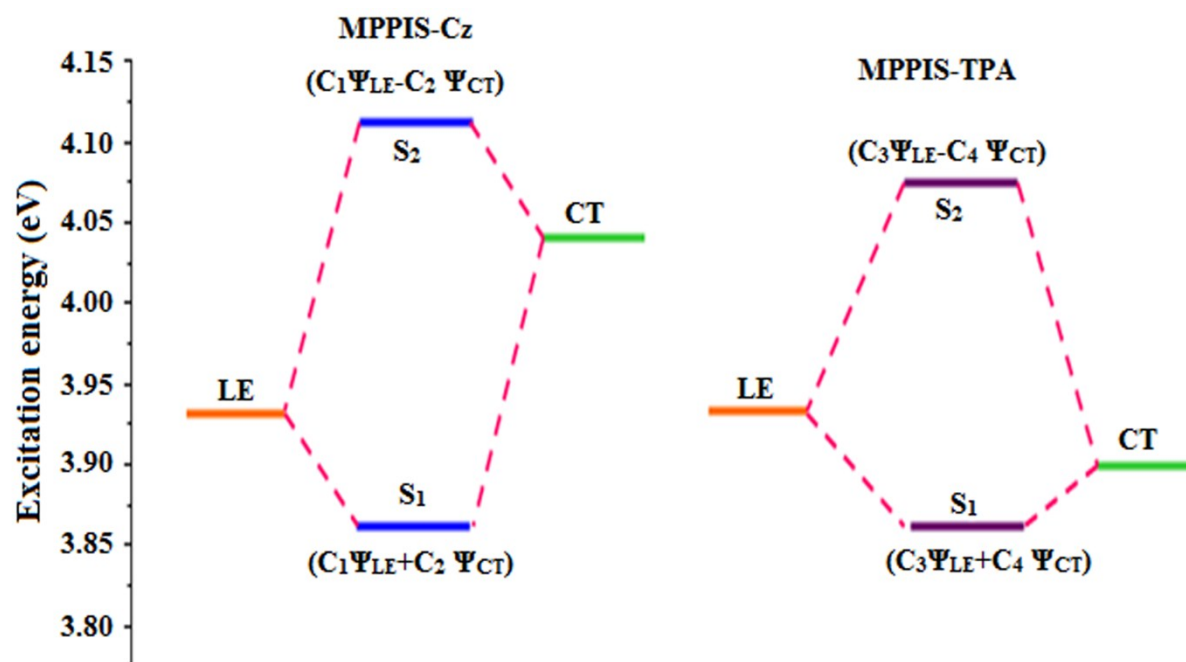

**SI-V: Tables****Table S1:** Computed oscillator strength ( $f$ ), dipole moment ( $\mu$ , D) and singlet-triplet energy difference ( $\Delta E_{ST}$ , eV) of MPPIS-Cz and MPPIS-TPA from NTOs

| <b>States</b> | <b>MPPIS-Cz</b> |                         |                                   | <b>MPPIS-TPA</b> |                         |                                   |
|---------------|-----------------|-------------------------|-----------------------------------|------------------|-------------------------|-----------------------------------|
|               | <b>f</b>        | <b><math>\mu</math></b> | <b><math>\Delta E_{ST}</math></b> | <b>f</b>         | <b><math>\mu</math></b> | <b><math>\Delta E_{ST}</math></b> |
| S1            | 0.76            | 3.31                    | 0.99                              | 0.61             | 3.43                    | 0.8                               |
| S2            | 0.11            | 1.33                    | 0.23                              | 0.07             | 0.85                    | 0.32                              |
| S3            | 0.04            | 0.84                    | 0.08                              | 0.19             | 1.07                    | 0.23                              |
| S4            | 0.26            | 1.45                    | 0.16                              | 0.50             | 2.06                    | 0.12                              |
| S5            | 0.47            | 2.12                    | 0.28                              | 0.10             | 0.95                    | 0.22                              |

**Table S2:** Computed excitation energy (eV), excitation coefficient and  $\Delta r$  intex ( $\text{\AA}$ ) for first five singlet–triplet states of MPPIS–Cz and MPPIS–TPA.

| Blue emissive materials | States | Singlet           |                        |                  | Triplet           |                        |                  |
|-------------------------|--------|-------------------|------------------------|------------------|-------------------|------------------------|------------------|
|                         |        | Excitation energy | Excitation coefficient | $\Delta r$ intex | Excitation energy | Excitation coefficient | $\Delta r$ intex |
| <b>MPPIS-Cz</b>         | 1      | 3.8609            | 0.4482                 | 1.6415           | 2.8631            | 0.2699                 | 1.5092           |
|                         | 2      | 4.1095            | 0.3955                 | 1.5550           | 3.8712            | 0.2898                 | 1.4717           |
|                         | 3      | 4.1492            | 0.4006                 | 1.0718           | 4.4048            | 0.2567                 | 1.3533           |
|                         | 4      | 4.2813            | 0.4092                 | 1.3105           | 4.4647            | 0.3750                 | 2.0859           |
|                         | 5      | 4.4558            | 0.3492                 | 2.0108           | 4.5166            | 0.2435                 | 1.4613           |
| <b>MPPIS-TPA</b>        | 1      | 3.6357            | 0.4106                 | 4.4238           | 2.8321            | 0.3208                 | 4.3506           |
|                         | 2      | 3.9425            | 0.4147                 | 4.2759           | 3.6421            | 0.2495                 | 3.9578           |
|                         | 3      | 4.1166            | 0.3909                 | 3.5190           | 3.8823            | 0.2607                 | 3.6791           |
|                         | 4      | 4.2305            | 0.3638                 | 3.1476           | 4.0964            | 0.1474                 | 4.3222           |
|                         | 5      | 4.3752            | 0.3799                 | 4.4551           | 4.1531            | 0.2465                 | 3.5310           |



**Table S3:** Computed integral of hole (H) and integral of electron (E) overlap ( $S_{H-E}$ ), distance between centroids of H and E ( $D_{H-E}$ , Å), integral of transition density and dipole moment ( $\mu$ , a.u) for  $S_1$ – $S_5$  states of MPPIS–Cz and MPPIS-TPA.

| Blue emissive materials | States | H    | E      | Transition density | $S_{H-E}$ | Centroid of H (Å) |       |       | Centroid of E (Å) |       |       | $D_{H-E}$ | $\mu$ |
|-------------------------|--------|------|--------|--------------------|-----------|-------------------|-------|-------|-------------------|-------|-------|-----------|-------|
|                         |        |      |        |                    |           | x                 | y     | z     | x                 | y     | z     |           |       |
| <b>MPPIS-Cz</b>         | S1     | 0.77 | 0.45   | 0.004              | 0.15      | -0.96             | 4.34  | 1.28  | -0.59             | 3.91  | 1.28  | 0.56      | 14.78 |
|                         | S2     | 0.81 | 0.65   | 0.009              | 0.33      | -3.08             | -1.10 | -0.18 | -1.15             | -1.41 | -0.36 | 1.96      | 13.84 |
|                         | S3     | 0.82 | 0.65   | 0.006              | 0.22      | -3.12             | -0.04 | -0.12 | -1.34             | -1.25 | -0.34 | 2.15      | 15.76 |
|                         | S4     | 0.86 | 0.63   | -0.001             | 0.53      | -5.29             | -1.54 | 0.15  | -5.86             | -1.45 | 0.13  | 0.56      | 12.96 |
|                         | S5     | 0.70 | 0.5102 | 0.005              | 0.27      | -1.74             | 1.00  | -0.12 | -1.52             | 0.79  | -0.44 | 0.44      | 13.86 |
| <b>MPPIS-TPA</b>        | S1     | 0.84 | 0.66   | 0.014              | 0.30      | 5.55              | -1.85 | -0.05 | 3.25              | -1.51 | -0.70 | 2.47      | 23.29 |
|                         | S2     | 0.87 | 0.63   | 0.003              | 0.55      | 6.30              | -1.92 | 0.14  | 6.79              | -1.81 | 0.23  | 0.51      | 21.20 |
|                         | S3     | 0.81 | 0.63   | 0.006              | 0.28      | 2.29              | 0.11  | -0.53 | 2.07              | -1.28 | -0.73 | 1.42      | 18.20 |
|                         | S4     | 0.76 | 0.55   | 0.008              | 0.38      | 2.13              | -0.37 | -0.35 | 2.06              | -0.34 | -0.46 | 0.13      | 17.38 |
|                         | S5     | 0.79 | 0.57   | 0.005              | 0.40      | 4.99              | -1.39 | -0.05 | 3.94              | -1.33 | -0.21 | 1.06      | 20.32 |

**Table S4:** Computed RMSD of electron and hole, H index and t index for S<sub>1</sub>–S<sub>5</sub> of MPPIS–Cz and MPPIS-TPA.

| Blue emissive materials | States | RMSD of electron |       |       |       | RMSD of hole |       |       |       | H index |        | t index |        |       |       |
|-------------------------|--------|------------------|-------|-------|-------|--------------|-------|-------|-------|---------|--------|---------|--------|-------|-------|
|                         |        | x                | y     | z     | total | x            | y     | z     | total |         |        | x       | y      | z     | total |
| <b>MPPIS-Cz</b>         | S1     | 1.034            | 1.665 | 1.007 | 2.203 | 0.918        | 1.069 | 0.842 | 1.641 | 1.917   | –0.613 | –0.932  | –0.925 | 1.449 |       |
|                         | S2     | 2.983            | 1.320 | 0.835 | 3.367 | 3.450        | 1.777 | 0.937 | 3.992 | 3.678   | –1.286 | –1.236  | –0.700 | 1.917 |       |
|                         | S3     | 2.938            | 1.537 | 0.877 | 3.430 | 2.536        | 2.406 | 0.998 | 3.636 | 3.501   | –0.961 | –0.783  | –0.710 | 1.429 |       |
|                         | S4     | 1.849            | 2.026 | 1.095 | 2.954 | 2.228        | 2.015 | 1.069 | 3.189 | 3.068   | –1.480 | –1.940  | –1.066 | 2.663 |       |
|                         | S5     | 2.734            | 1.709 | 1.106 | 3.409 | 2.519        | 2.341 | 1.056 | 3.597 | 3.448   | –2.404 | –1.818  | –0.761 | 3.108 |       |
| <b>MPPIS-TPA</b>        | S1     | 3.164            | 1.425 | 0.940 | 3.595 | 3.564        | 1.691 | 1.055 | 4.083 | 3.839   | –1.065 | –1.225  | –0.343 | 1.659 |       |
|                         | S2     | 2.827            | 2.101 | 1.069 | 3.681 | 3.177        | 1.939 | 1.069 | 3.873 | 3.773   | –2.509 | –1.909  | –0.979 | 3.301 |       |
|                         | S3     | 3.811            | 1.439 | 0.903 | 4.172 | 4.360        | 2.027 | 0.939 | 4.899 | 4.532   | –3.861 | –0.341  | –0.721 | 3.943 |       |
|                         | S4     | 4.598            | 1.980 | 1.075 | 5.120 | 5.127        | 2.070 | 1.002 | 5.619 | 5.369   | –4.790 | –1.996  | –0.929 | 5.272 |       |
|                         | S5     | 4.317            | 2.162 | 1.163 | 4.967 | 4.299        | 2.098 | 1.068 | 4.901 | 4.934   | –3.258 | –2.069  | –0.955 | 3.976 |       |

**Table S5:** Transferred charges ( $q_{CT}$ ), barycentres of electron density loss ( $R_+$ ) / gain ( $R_-$ ), distance between two barycenters ( $D_{CT}$ ), dipole moment of CT ( $\mu_{CT}$ ), RMSD of +ve / -ve parts, CT indices (H & t) and overlap integral of C+ / C- of MPPIS-Cz and MPPIS-TPA

| Blue emissive materials | $q_{CT}$<br>$ e^{-1} $ | $R_+$ (Å) |       |       | $R_-$ (Å) |      |       | $D_{CT}$ (Å) | $\mu_{CT}$<br>(D) | ( +ve)<br>RMSD | ( -ve)<br>RMSD | H / t<br>(Å) | (C+ / C-) |
|-------------------------|------------------------|-----------|-------|-------|-----------|------|-------|--------------|-------------------|----------------|----------------|--------------|-----------|
|                         |                        | x         | y     | z     | x         | y    | z     |              |                   |                |                |              |           |
| MPPIS-Cz                | 157.9-113.7            | -0.23     | 0.31  | 0.041 | -0.66     | 0.18 | 0.13  | 0.469        | 348.3             | 11.9           | 11.7           | 6.3/5.8      | 0.9939    |
| MPPIS-TPA               | 156.5-112.5            | -0.06     | -0.09 | 0.001 | -0.44     | 0.35 | -0.09 | 0.607        | 179.9             | 14.1           | 13.2           | 7.2/6.6      | 0.9795    |

**Table S6:** Photophysical properties of MPPIS–Cz in different solvents.

| Solvents        | $\epsilon$ | n      | f( $\epsilon, n$ ) | ET(30) | $\lambda_{\text{abs}}$<br>(nm) | $\nu_{\text{abs}}$<br>( $\text{cm}^{-1}$ ) | $\lambda_{\text{emi}}$<br>(nm) | $\nu_{\text{emi}}$<br>( $\text{cm}^{-1}$ ) | $\nu_{\text{ss}}$<br>( $\text{cm}^{-1}$ ) | $\Delta G$<br>(kcal/mol) | $\Delta (\Delta G_{\text{hex}} - \Delta G_{\text{sol}})$<br>(kcal/mol) | $\lambda$<br>(kcal/mol) |
|-----------------|------------|--------|--------------------|--------|--------------------------------|--------------------------------------------|--------------------------------|--------------------------------------------|-------------------------------------------|--------------------------|------------------------------------------------------------------------|-------------------------|
| Hexane          | 1.88       | 1.3700 | 0.000411           | 32.4   | 322                            | 31055.90                                   | 384                            | 26041.67                                   | 5014.234                                  | 81.61                    | 0.00                                                                   | 7.17                    |
| Dioxane         | 2.22       | 1.4226 | 0.021437           | 36.0   | 326                            | 30674.85                                   | 390                            | 25641.03                                   | 5033.821                                  | 80.49                    | 1.12                                                                   | 7.19                    |
| Benzene         | 2.28       | 1.4260 | 0.026639           | 34.3   | 331                            | 30211.48                                   | 398                            | 25125.63                                   | 5085.852                                  | 79.09                    | 2.52                                                                   | 7.27                    |
| Ether           | 4.27       | 1.3526 | 0.164721           | 34.5   | 328                            | 30487.80                                   | 407                            | 24570.02                                   | 5917.780                                  | 78.69                    | 2.92                                                                   | 8.46                    |
| Ethyl acetate   | 6.09       | 1.4131 | 0.186569           | 38.1   | 331                            | 30211.48                                   | 412                            | 24271.84                                   | 5939.636                                  | 77.87                    | 3.74                                                                   | 8.49                    |
| Dichloromethane | 9.08       | 1.4242 | 0.218349           | 40.7   | 328                            | 30487.80                                   | 420                            | 23809.52                                   | 6678.281                                  | 77.60                    | 4.01                                                                   | 9.54                    |
| Butanol         | 17.40      | 1.3990 | 0.218349           | 49.7   | 332                            | 30120.48                                   | 428                            | 23364.49                                   | 6755.996                                  | 76.44                    | 5.17                                                                   | 9.66                    |
| 2-propanol      | 20.18      | 1.3780 | 0.276378           | 48.4   | 330                            | 30303.03                                   | 436                            | 22935.78                                   | 7367.250                                  | 76.09                    | 5.52                                                                   | 10.53                   |
| Acetone         | 21.01      | 1.3588 | 0.284780           | 42.2   | 325                            | 30769.23                                   | 443                            | 22573.36                                   | 8195.867                                  | 76.24                    | 5.37                                                                   | 11.71                   |
| Ethanol         | 25.30      | 1.3611 | 0.289727           | 51.9   | 324                            | 30864.20                                   | 451                            | 22172.95                                   | 8691.249                                  | 75.80                    | 5.81                                                                   | 12.42                   |
| Methanol        | 33.00      | 1.3288 | 0.308634           | 55.4   | 336                            | 29761.90                                   | 459                            | 21786.49                                   | 7975.412                                  | 73.68                    | 7.93                                                                   | 11.40                   |
| Acetonitrile    | 37.50      | 1.3442 | 0.305378           | 45.6   | 329                            | 30395.14                                   | 465                            | 21505.38                                   | 8889.760                                  | 74.18                    | 7.43                                                                   | 12.71                   |
| Ethyleneglycol  | 41.40      | 1.4318 | 0.276212           | 55.9   | 334                            | 29940.12                                   | 470                            | 21276.60                                   | 8663.524                                  | 73.20                    | 8.41                                                                   | 12.38                   |
| Water           | 80.34      | 1.3330 | 0.263594           | 63.1   | 337                            | 29673.59                                   | 474                            | 21097.05                                   | 8576.544                                  | 72.56                    | 9.05                                                                   | 12.26                   |

**Table S7:** Photophysical properties of MPPIS–TPA in different solvents.

| Solvents        | $\epsilon$ | n      | f( $\epsilon, n$ ) | ET(30) | $\lambda_{\text{abs}}$<br>(nm) | $\nu_{\text{abs}}$<br>( $\text{cm}^{-1}$ ) | $\lambda_{\text{emi}}$<br>(nm) | $\nu_{\text{emi}}$<br>( $\text{cm}^{-1}$ ) | $\nu_{\text{ss}}$<br>( $\text{cm}^{-1}$ ) | $\Delta G$<br>(kcal/mol) | $\Delta (\Delta G_{\text{hex}} - \Delta G_{\text{sol}})$<br>(kcal/mol) | $\lambda$<br>(kcal/mol) |
|-----------------|------------|--------|--------------------|--------|--------------------------------|--------------------------------------------|--------------------------------|--------------------------------------------|-------------------------------------------|--------------------------|------------------------------------------------------------------------|-------------------------|
| Hexane          | 1.88       | 1.3700 | 0.000411           | 32.4   | 342                            | 29239.77                                   | 418                            | 23923.44                                   | 5316.321                                  | 75.98                    | 0.00                                                                   | 7.60                    |
| Dioxane         | 2.22       | 1.4226 | 0.021437           | 36     | 343                            | 29154.52                                   | 420                            | 23809.52                                   | 5344.995                                  | 75.70                    | 0.28                                                                   | 7.64                    |
| Benzene         | 2.28       | 1.4260 | 0.026639           | 34.3   | 345                            | 28985.51                                   | 424                            | 23584.91                                   | 5400.602                                  | 75.14                    | 0.84                                                                   | 7.72                    |
| Ether           | 4.27       | 1.3526 | 0.164721           | 34.5   | 349                            | 28653.30                                   | 428                            | 23364.49                                   | 5288.809                                  | 74.35                    | 1.63                                                                   | 7.56                    |
| Ethyl acetate   | 6.09       | 1.4131 | 0.186569           | 38.1   | 348                            | 28735.63                                   | 431                            | 23201.86                                   | 5533.776                                  | 74.23                    | 1.75                                                                   | 7.91                    |
| Dichloromethane | 9.08       | 1.4242 | 0.218349           | 40.7   | 350                            | 28571.43                                   | 444                            | 22522.52                                   | 6048.906                                  | 73.03                    | 2.95                                                                   | 8.65                    |
| Butanol         | 17.40      | 1.3990 | 0.218349           | 49.7   | 354                            | 28248.59                                   | 451                            | 22172.95                                   | 6075.639                                  | 72.07                    | 3.91                                                                   | 8.68                    |
| 2-propanol      | 20.18      | 1.3780 | 0.276378           | 48.4   | 354                            | 28248.59                                   | 456                            | 21929.82                                   | 6318.763                                  | 71.72                    | 4.26                                                                   | 9.03                    |
| Acetone         | 21.01      | 1.3588 | 0.284780           | 42.2   | 357                            | 28011.20                                   | 463                            | 21598.27                                   | 6412.932                                  | 70.90                    | 5.08                                                                   | 9.17                    |
| Ethanol         | 25.30      | 1.3611 | 0.289727           | 51.9   | 354                            | 28248.59                                   | 469                            | 21321.96                                   | 6926.626                                  | 70.85                    | 5.13                                                                   | 9.90                    |
| Methanol        | 33.00      | 1.3288 | 0.308634           | 55.4   | 354                            | 28248.59                                   | 474                            | 21097.05                                   | 7151.541                                  | 70.53                    | 5.45                                                                   | 10.22                   |
| Acetonitrile    | 37.50      | 1.3442 | 0.305378           | 45.6   | 356                            | 28089.89                                   | 480                            | 20833.33                                   | 7256.554                                  | 69.92                    | 6.06                                                                   | 10.37                   |
| Ethyleneglycol  | 41.40      | 1.4318 | 0.276212           | 55.9   | 356                            | 28089.89                                   | 484                            | 20661.16                                   | 7428.731                                  | 69.68                    | 6.30                                                                   | 10.62                   |
| Water           | 80.34      | 1.3330 | 0.263594           | 63.1   | 360                            | 27777.78                                   | 488                            | 20491.80                                   | 7285.974                                  | 68.99                    | 6.99                                                                   | 10.41                   |

**REFERENCES**

- [1] J. M. Foster and S. F. Boys, *Rev. Mod. Phys.*, 1960, **32**, 300-302.
- [2] S. F. Boys, *Rev. Mod. Phys.*, 1960, **32**, 296-299.
- [3] H. Fang, J. Bian, L. Li and W. J. Yang, *Chem. Phys.*, 2004, **120**, 9458-9466.
- [4] Q. A. Smith, K. Ruedenberg, M. K. Gordon and L. V. Splipchenko, *J. Chem. Phys.*, 2012, **136**, 244107-12.
